# Supplementary material for: Low use of artemisinin-based combination therapy for febrile children under five and barriers to correct fever management in Benin: a decade after WHO recommendation
Source: Springer Nature journal article supplement (doi:10.1186/s12889-018-5077-6), 2018-01-22

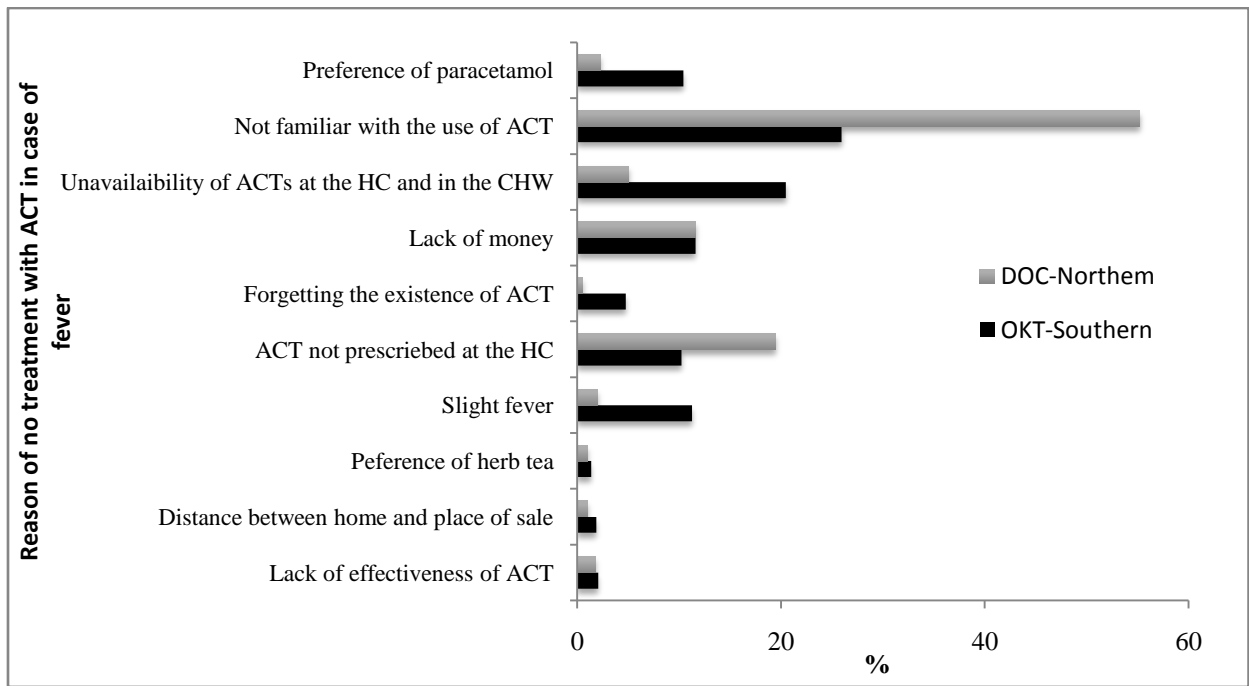

Supplement: MOESM2 [file 15406472]
